# Supplementary material for: Redox-induced Ru(bpy)32+-methylviologen radical formation and its dimerization in cucurbit[8]uril
Source: Royal Society of Chemistry journal article supplement (doi:10.1039/c0cp00712a), 2010-11-01
Supplement: c0cp00712a.pdf [file c0cp00712a.pdf]

## Supporting information

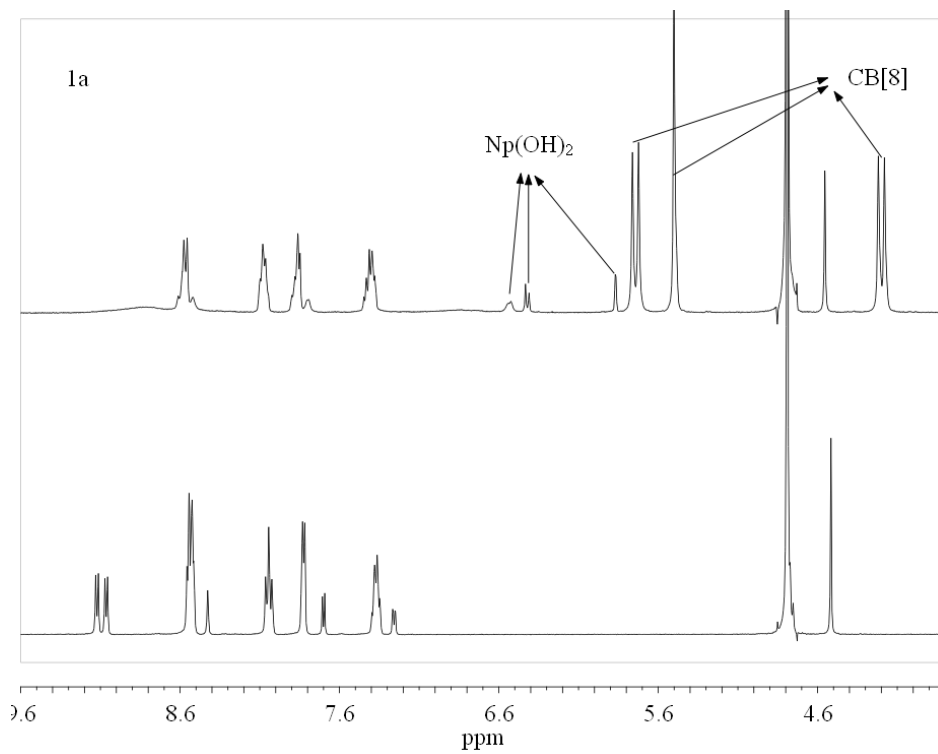

**Figure S1** <sup>1</sup>H NMR spectra (400 MHz, D<sub>2</sub>O) of complex **1a** alone (down), after addition of 1 equiv of CB[8] and 1 equiv of Np(OH)<sub>2</sub> (up).

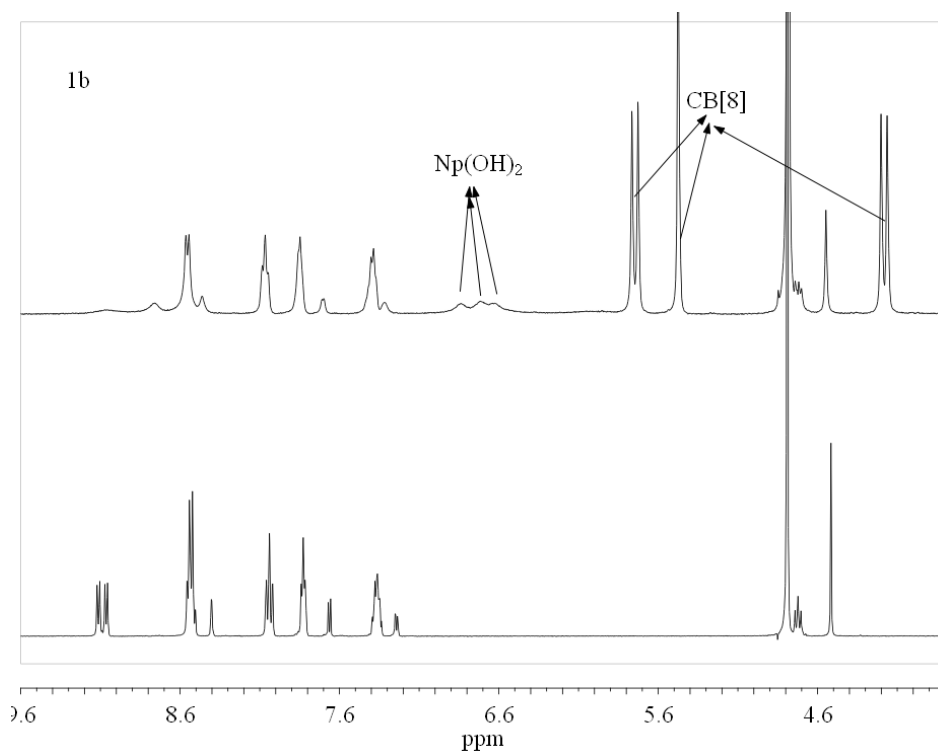

**Figure S2** <sup>1</sup>H NMR spectra (400 MHz, D<sub>2</sub>O) of complex **1b** alone (down), after addition of 1 equiv of CB[8] and 1 equiv of Np(OH)<sub>2</sub> (up).
